# Supplementary material for: Graphene quantum dot surface ligand and Co and Pt double-doping-engineered Co/Co3O4 nanozyme displaying superior performance to horseradish peroxidase and choline oxidase for the efficient degradation of rhodamine B without an activator
Source: Royal Society of Chemistry journal article supplement (doi:10.1039/d4nj01266f), 2024-01-01
Supplement: d4nj01266f1.pdf [file d4nj01266f1.pdf]

## Supporting Information

# **Graphene quantum dot surface ligand and Co and Pt double doping engineering Co/C<sub>3</sub>O<sub>4</sub> nanozyme superior to horseradish peroxidase and choline oxidase for efficient degradation of Rhodamine B without activator**

**Li Nana, Li Ruiyi, Li Zaijun\* and Liu Xiaohao**

*Key Laboratory of Synthetic and Biological Colloids, Ministry of Education, School of Chemical and Material Engineering, School of Life Sciences and Health Engineering, Jiangnan University, Wuxi 214122, China*

---

\*Corresponding author: Tel.:13912371144. E-mail address: zaijunli@jiangnan.edu.cn (Li ZJ)

## 1. Experimental Section

### 1.1. Materials and reagents

Citric acid, tryptophan, glutamate, cobalt chloride, sodium acetate, acetic acid, chloroplatinic acid hexahydrate ( $\text{H}_2\text{PtCl}_6 \cdot 6\text{H}_2\text{O}$ ), hydrogen peroxide ( $\text{H}_2\text{O}_2$ ), rhodamine B and other reagents employed were all of the highest analytical grade or quality reagents purchased from Shanghai Chemical Company (Shanghai, China). 3,3',5,5'-tetramethylbenzidine (TMB) was purchased from Sigma-Aldrich (Mainland, China). Acetate buffer (0.2 M, pH 3.5) was prepared by the laboratory. Ultrapure water (18.2 M $\Omega$  cm) purified from a Milli-Q purification system was used throughout the experiment.

### 1.2. Apparatus

Transmission electron microscope (TEM) images were conducted on Tecnai F20 microscope at 200 keV (FEI, America). X-ray photoelectron spectroscopy (XPS) measurement was performed using a Thermo Scientific K-Alpha spectrometer with monochromated Al K $\alpha$  radiation (Thermo Scientific, America). X-ray diffraction (XRD) pattern was measured on X-ray D8 Advance Instrument operated at 40 kV and 20 mA, using Cu-K $\alpha$  radiation source with  $\lambda=0.15406$  nm (Bruker AXS, Germany). Raman measurement was carried out using InVia laser micro-confocal Raman Spectrometer (Renishaw, England). Infrared spectra (IR) were recorded on a Nicolet FT-IR 6700 spectrometer (Thermo Fisher Scientific, America). UV-visible spectra were recorded on UV-2700 spectrometer (Shimadzu, Japan). Electrochemical testing was conducted on CHI 660D (Chenhua, shanghai). UV-diffuse reflectance spectra were collected by a UV-vis-NIR spectrometer (Hitachi UV-3600 plus) with BaSO<sub>4</sub> as the background. Electron paramagnetic resonance (EPR) spectra were measured at room temperature using the Bruker EMX PLUS spectrometer. Total organic carbon (TOC) tests were performed by Rhodamine B degraded solution (10 mL) by a TOC analyzer (Shimadzu, TOC-VCPH, Japan).

### 1.3. EW-GQD preparation

Mixture of citric acid (2 g), glutamate (1.4 g) and tryptophan (0.97 g) were dissolved in 50 mL of ultrapure water. Then, it was heated at 80°C under stirring until free water was removed and at 170°C for 3 h. The collected EW-GQD crude was dissolved in ultrapure water to form a 100 mg mL<sup>-1</sup> EW-GQD solution. To obtain EW-GQD, the solution was orderly treated by filtering, dialysis with 3000 Da and freeze-drying<sup>1</sup>.

### 1.4. Steady-state dynamic parameter measurement

H<sub>2</sub>O<sub>2</sub> and TMB were used as substrate to measure the steady-state dynamic parameters of Pt/Co/Co<sub>3</sub>O<sub>4</sub>/EW-GQD as peroxidase-like nanozyme, respectively<sup>1</sup>. When H<sub>2</sub>O<sub>2</sub> was used as the substrate, a series of reaction solutions were prepared by mixing 100 μL of 1.0 mM TMB with 750 μL of 0.2 M acetate buffer solution (pH 3.5) and 100 μL of different concentration of H<sub>2</sub>O<sub>2</sub> solution. After 50 μL of 1.0 mg mL<sup>-1</sup> Pt/Co/Co<sub>3</sub>O<sub>4</sub>/EW-GQD dispersion was injected into the above reaction solution, the absorbances at 652 nm was monitored by spectrophotometer. When TMB was used as substrate, a series of reaction solutions were prepared by mixing 100 μL of 100 mM H<sub>2</sub>O<sub>2</sub>, 750 μL of 0.2 M acetate buffer solution (pH 3.5) and 100 μL of different concentration of TMB solution. After 50 μL of 1.0 mg mL<sup>-1</sup> Pt/Co/Co<sub>3</sub>O<sub>4</sub>/EW-GQD dispersion was injected into the above reaction solution, its absorbances at 652 nm was monitored by spectrophotometer.

TMB was used as the substrate to measure the steady-state dynamic parameters of Pt/Co/Co<sub>3</sub>O<sub>4</sub>/EW-GQD as oxidase-like nanozyme. A series of reaction solutions were prepared by mixing 850 μL of 0.2 M acetate buffer solution (pH 3.5) and 100 μL of different concentration of TMB solution. After 50 μL of 1.0 mg mL<sup>-1</sup> Pt/Co/Co<sub>3</sub>O<sub>4</sub>/EW-GQD dispersion

was injected into the above reaction solution, its absorbances at 652 nm was monitored by spectrophotometer.

The steady-state dynamic parameters were calculated by Lineweaver-Burk equation (1):

$$\frac{1}{V} = \frac{K_M}{V_{max}} \times \frac{1}{[S]} + \frac{1}{V_{max}} \quad (1)$$

where  $V$ ,  $V_{max}$ ,  $[S]$  and  $K_M$  present the initial reaction rate, maximum reaction rate, substrate concentration and Michaelis-Menten constant of steady-state dynamic process.

### 1.5. Enzyme activity calculation

Specific activity of Pt/Co/Co<sub>3</sub>O<sub>4</sub>/EW-GQD nanozyme was calculated by the equation (2)<sup>2</sup>:

$$b_{nanozyme} = V / (\epsilon \times L) \times (\Delta A / \Delta t) \quad (2)$$

where,  $b_{nanozyme}$  (U),  $V$ ,  $\epsilon$ ,  $L$  and  $\Delta A / \Delta t$  present the activity of nanozyme, total volume of a reaction system (1000  $\mu$ L), molar absorption coefficient of TMB (39000 M<sup>-1</sup> cm<sup>-1</sup>), optical length of cell, and change rate of the absorbance at 652 nm. The specific activity ( $a_{nanozyme}$ , U mg<sup>-1</sup>) of nanozyme was calculated by using equation (3)<sup>2</sup>:

$$a_{nanozyme} = b_{nanozyme} / [m] \quad (3)$$

where,  $[m]$  presents mass of nanozyme.

### 1.6. DFT calculation

The reaction mechanism of oxidase and peroxidase-like Pt/Co/Co<sub>3</sub>O<sub>4</sub>/EW-GQD was studied by first principles calculation (DFT) method<sup>3, 4</sup>. The generalized gradient approximation (GGA) of PBE functional was used to deal with variation-correlation interactions<sup>5</sup>. A double numerical (DN) base set is used for geometric optimization and total energy calculation. The k-point in the Brillouin zone is set to 2×2×1 mesh using the Monkhorst-Pack grid. The vacuum spacing perpendicular to the direction of the structural plane is 15 Å to avoid interaction between adjacent molecules. The convergence tolerance of SCF is 1.0×10<sup>-5</sup> Ha.



The geometrically optimized energy and maximum force are  $1.0 \times 10^{-5}$  Ha and  $0.004$  Ha  $\text{\AA}^{-1}$ , respectively. The crystal structures of the  $(2 \times 2 \times 1)$   $\text{Co}_3\text{O}_4$  (220) surface obtained from the Materials Project online service (ID: mp-18748) was built to represent the catalytic surfaces of catalyst. And graphene is obtained by supercell  $(3 \times 3)$  the crystal surface of graphite (001). The Gibbs free energies of  $^*\text{OO}$ ,  $^*\text{OOH}$ ,  $^*\text{O}$ ,  $^*\text{OH}$ ,  $^*\text{H}_2\text{O}_2$ ,  $^*\text{OH}-^*\text{OH}$  and  $^*\text{OH}$  on the surface of Pt doped  $\text{Co}_3\text{O}_4/\text{EW-GQD}$ ,  $\text{Co}_3\text{O}_4/\text{EW-GQD}$  and  $\text{Co}_3\text{O}_4$  were evaluated by using DFT calculations. The Gibbs free energy diagram for oxidase and peroxide-like was constructed by calculating the change in Gibbs free energy ( $\Delta G$ ) for each basic reaction step at  $25^\circ\text{C}$ .  $\Delta G$  was calculated by subtracting the Gibbs free energy of the reactant from the product. The form is as follows:  $\Delta G = \Delta E - T\Delta S$ , where  $T$  is the absolute temperature,  $S$  is the entropy, and  $E$  is the energy. The adsorption energy of different catalyst for  $\bullet\text{OH}$  were calculated by following equation:  $E_{\text{ads}, \bullet\text{OH}} = E_{\bullet\text{OH}@catalyst} - E_{\text{catalyst}} - E_{\bullet\text{OH}}$ , where  $E_{\bullet\text{OH}@catalyst}$  was the total energy of catalyst with an adsorbed hydroxyl,  $E_{\text{catalyst}}$ , and  $E_{\bullet\text{OH}}$  were the total energies of catalyst and one free hydroxyl radical, respectively.

### 1.7. Total organic carbon test

The ability of Pt/Co/ $\text{Co}_3\text{O}_4/\text{EW-GQD}$  to mineralize Rhodamine B was determined by monitoring the change of total organic carbon (TOC) content under different reaction times during Rhodamine B degradation. The TOC removal efficiency is calculated by the following formula.

$$\text{TOC Removal Efficiency (\%)} = \frac{\text{TOC}_0 - \text{TOC}_t}{\text{TOC}_0} \times 100\% \quad (4)$$

where,  $\text{TOC}_0$  is the TOC value of the initial concentration of reaction solution and  $\text{TOC}_t$  is the TOC value of the reaction solution at different time.

## 2. Results and discussion

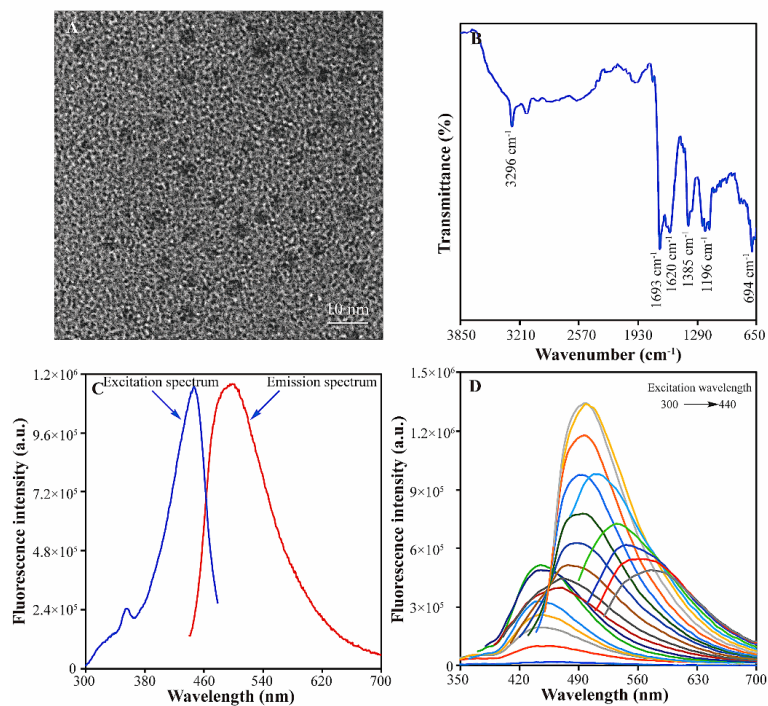

**Fig. S1** TEM (A), FT-IR (B), excitation spectrum and emission spectrum (C) of EW-GQD and the emission spectra (D) of EW-GQD at different excitation wavelengths.

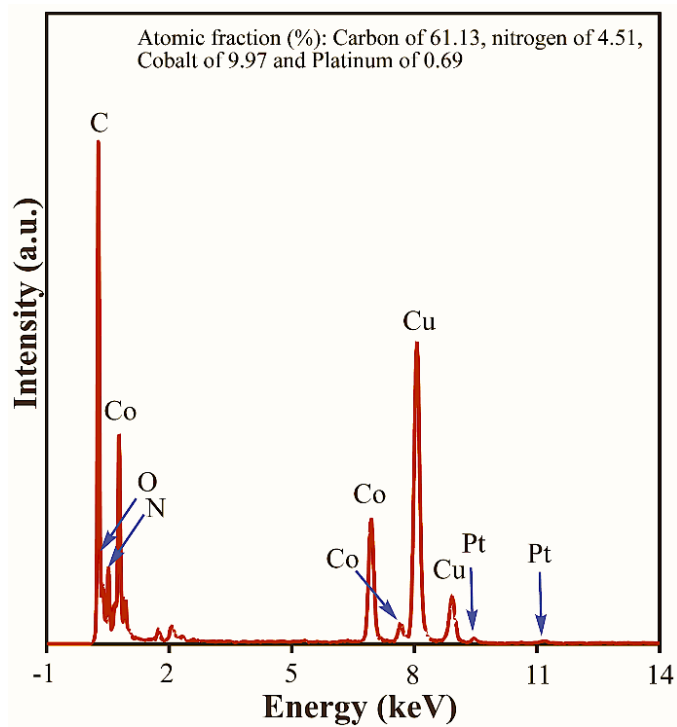

**Fig. S2** EDS spectrum of Pt/Co/Co<sub>3</sub>O<sub>4</sub>/EW-GQD.

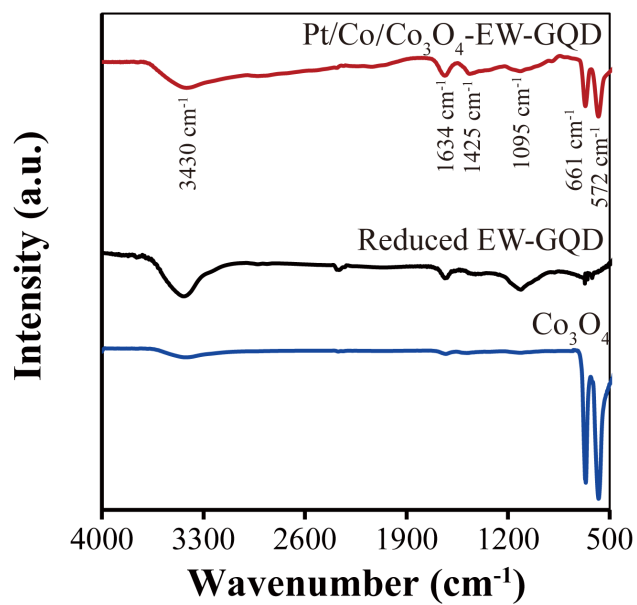

**Fig. s3** FTIR spectra (A) of Pt/Co/Co<sub>3</sub>O<sub>4</sub>/EW-GQD, reduced EW-GQD and Co<sub>3</sub>O<sub>4</sub>.

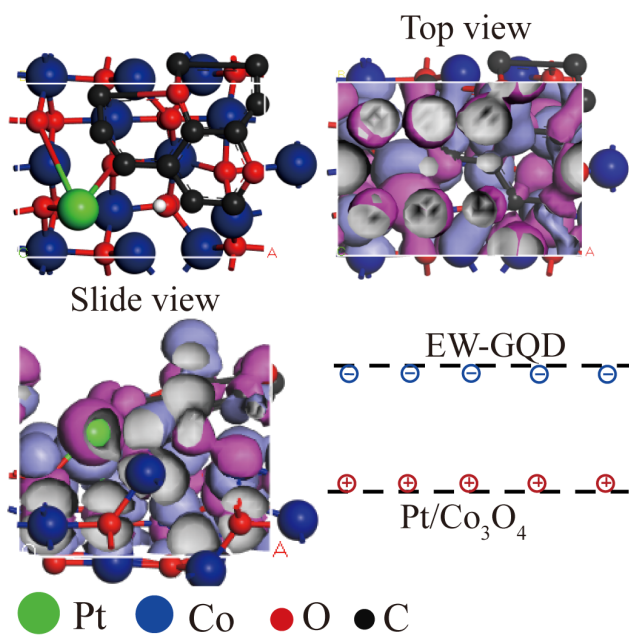

**Fig. s4** Charge density difference maps of heterojunction combined by EW-GQD and Pt/Co/Co<sub>3</sub>O<sub>4</sub>. The blue and pink iso-surfaces represent gain and loss of electrons respectively

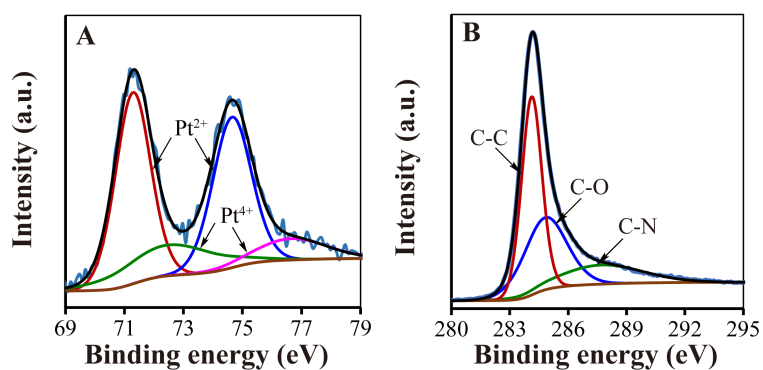

**Fig. s5** High-resolution Pt4f (A) and C1s (B) XPS spectra of Pt/Co/Co<sub>3</sub>O<sub>4</sub>/EW-GQD.

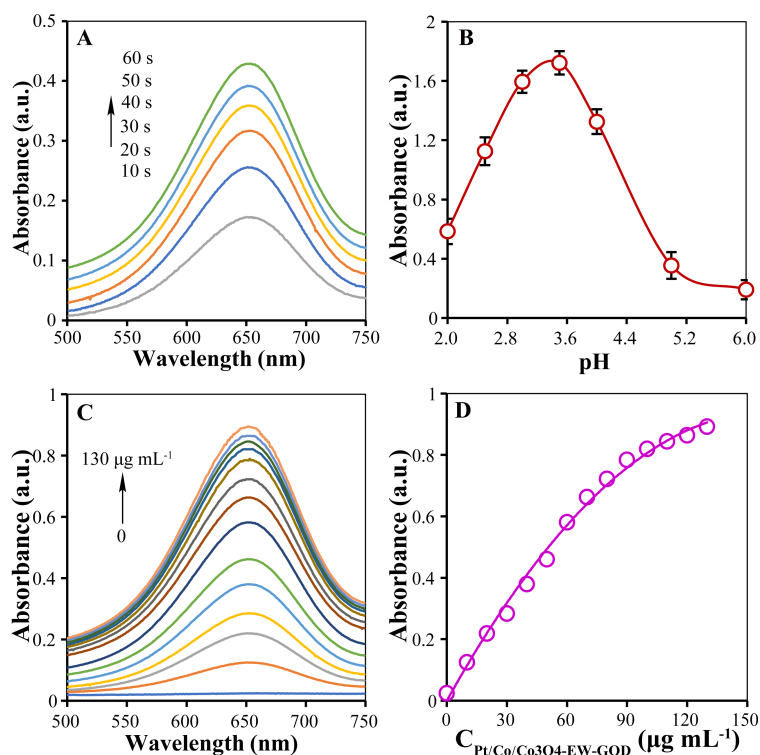

**Fig. s6** Absorption spectra (A) of Pt/Co/Co<sub>3</sub>O<sub>4</sub>/EW-GQD+TMB under different catalyst concentrations (Pt/Co/Co<sub>3</sub>O<sub>4</sub>/EW-GQD concentration from bottom to top is 10, 20, 30, 40, 50, 60, 70, 80, 90, 100, 110, 120, 130 µg mL<sup>-1</sup>); the relationship curve (B) between absorbance at 652 nm and Pt/Co/Co<sub>3</sub>O<sub>4</sub>/EW-GQD concentration; the relationship curve between absorbance at 652 nm and incubation time of the reaction system at a concentration of 100 µg mL<sup>-1</sup>; the relationship curve between pH and the absorbance at 652nm of Pt/Co/Co<sub>3</sub>O<sub>4</sub>/EW-GQD+TMB.

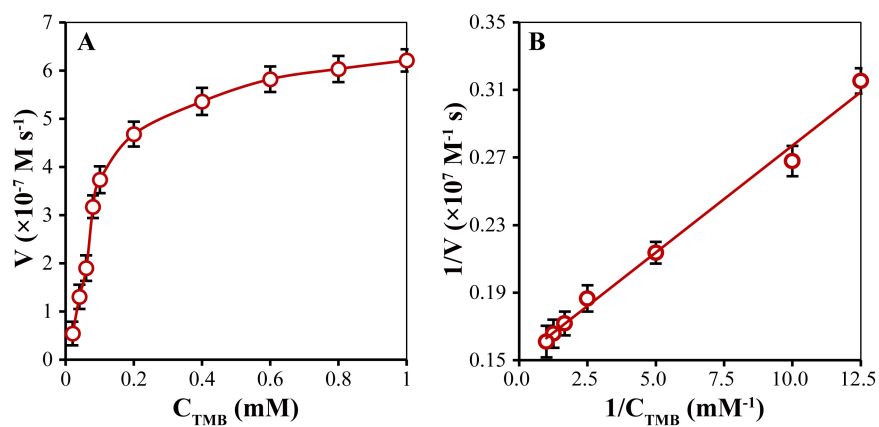

Fig. s7 Steady-state kinetic assay (A) and Lineweaver-Burk plot (B) for TMB of Co/Co<sub>3</sub>O<sub>4</sub>/EW-GQD.

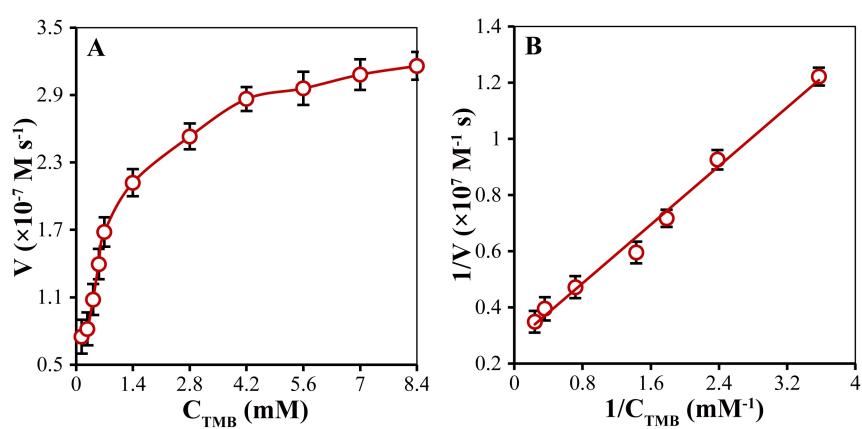

Fig. s8 Steady-state kinetic assay (A) and Lineweaver-Burk plot (B) for TMB of Co/Co<sub>3</sub>O<sub>4</sub>.

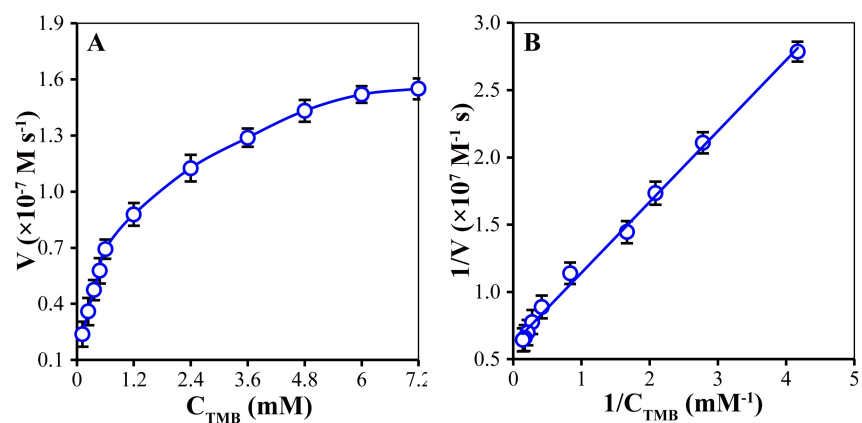

Fig. s9 Steady-state kinetic assay (A) and Lineweaver-Burk plot (B) for TMB of Co<sub>3</sub>O<sub>4</sub>.

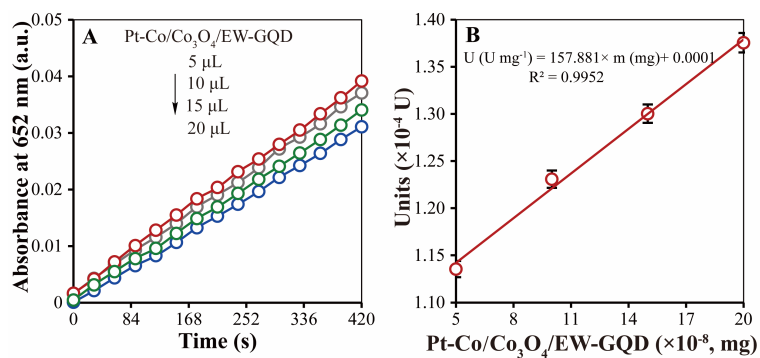

**Fig. s10** Plots of the TMB reaction solutions added 5, 10, 15 and 20  $\mu\text{L}$  of  $10 \text{ ng mL}^{-1}$  Pt/Co/Co<sub>3</sub>O<sub>4</sub>/EW-GQD vs. the incubation time (A), and relationship curve of oxidase-like activity ( $\text{U mg}^{-1}$ ) with the amounts of Pt/Co/Co<sub>3</sub>O<sub>4</sub>/EW-GQD in the TMB reaction solution (B).

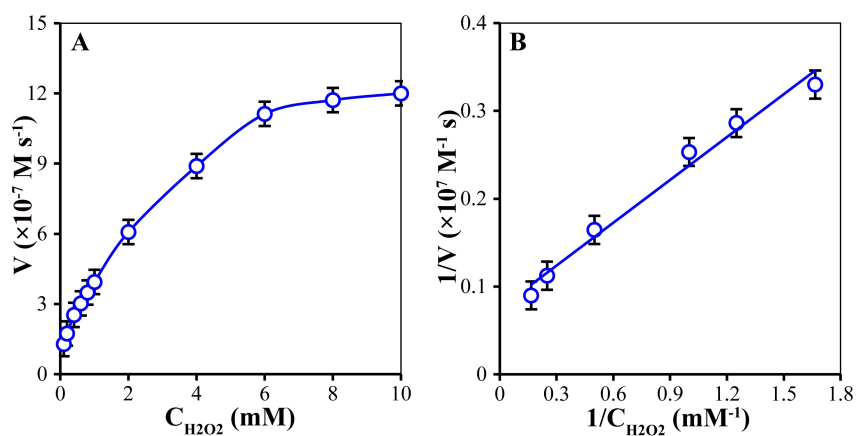

**Fig. s11** Steady-state kinetic assay (A) and Lineweaver–Burk plot (B) for H<sub>2</sub>O<sub>2</sub> of Pt/Co/Co<sub>3</sub>O<sub>4</sub>/EW-GQD.

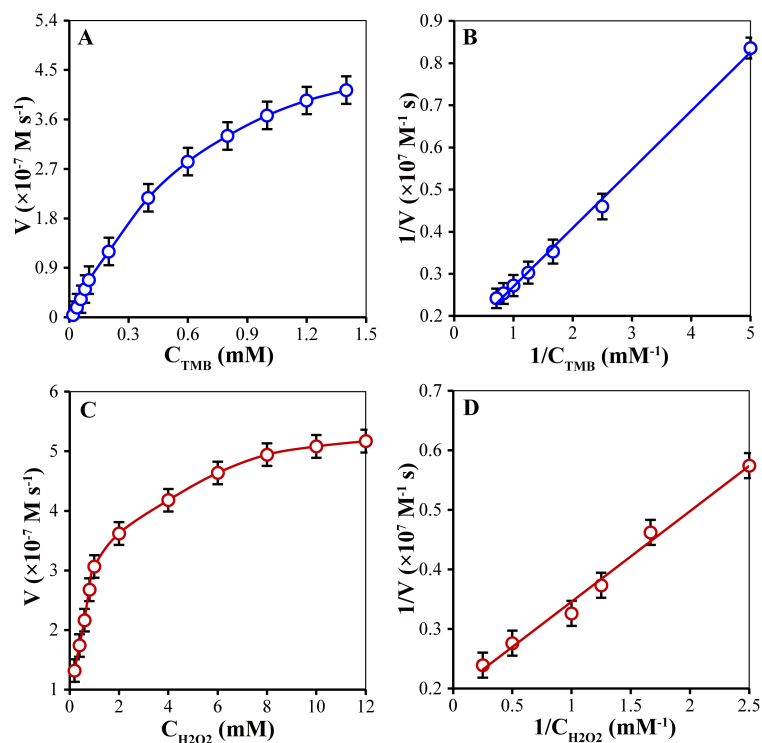

**Fig. s12** Steady-state kinetic assay (A and C) and Lineweaver–Burk plot (B and D) for TMB and H<sub>2</sub>O<sub>2</sub> of Co/Co<sub>3</sub>O<sub>4</sub>/EW-

GQD

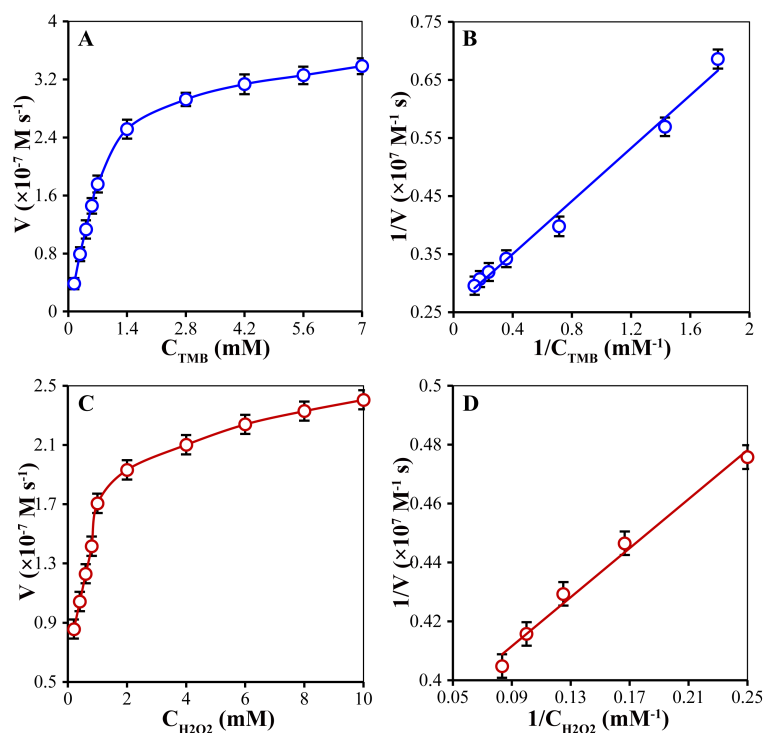

**Fig. s13** Steady-state kinetic assay (A and C) and Lineweaver–Burk plot (B and D) for TMB and H<sub>2</sub>O<sub>2</sub> of Co/Co<sub>3</sub>O<sub>4</sub>.

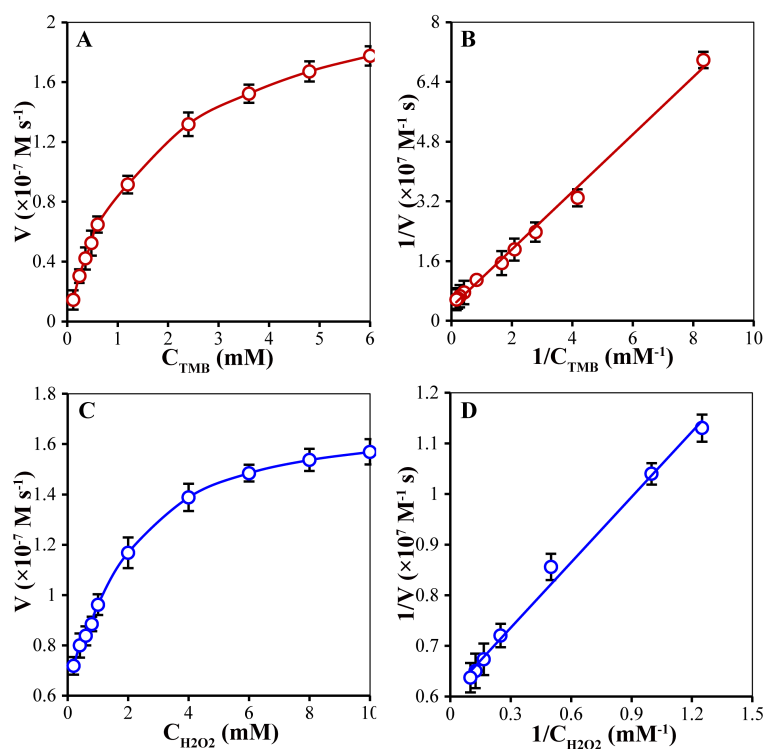

Fig. s14 Steady-state kinetic assay (A and C) and Lineweaver–Burk plot (B and D) for TMB and H<sub>2</sub>O<sub>2</sub> of Co<sub>3</sub>O<sub>4</sub>.

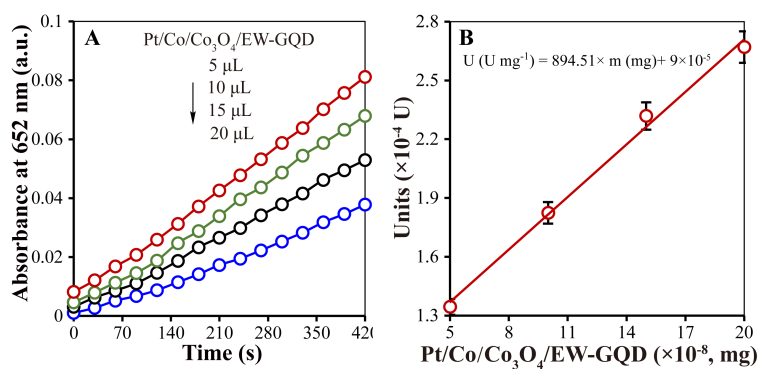

Fig. s15 Plots of the TMB reaction solutions added 5, 10, 15 and 20  $\mu\text{L}$  of  $10 \text{ ng mL}^{-1}$  Pt/Co/Co<sub>3</sub>O<sub>4</sub>/EW-GQD vs. the incubation time (A), and relationship curve of peroxidase-like activity ( $\text{U mg}^{-1}$ ) with the amounts of Pt/Co/Co<sub>3</sub>O<sub>4</sub>/EW-GQD in the TMB reaction solution (B).

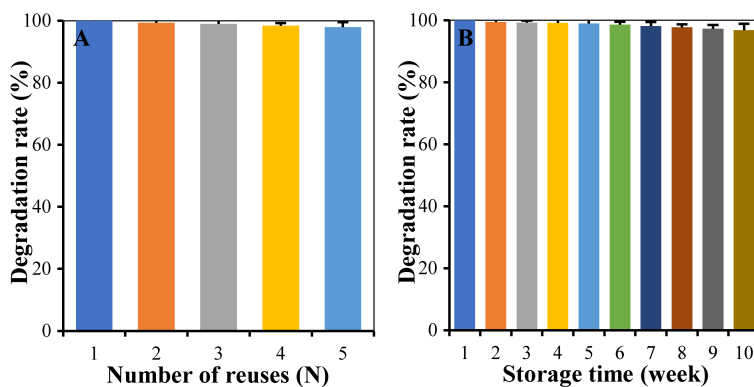



**Fig. s16** Degradation efficiencies of 5 min incubation in the presence of  $0.6 \text{ mg mL}^{-1}$  Pt/Co/Co<sub>3</sub>O<sub>4</sub>/EW-GQD with different number of reuses (E), and degradation efficiencies of Rhodamine B in the presence of  $0.6 \text{ mg mL}^{-1}$  Pt/Co/Co<sub>3</sub>O<sub>4</sub>/EW-GQD with different standing time (F).

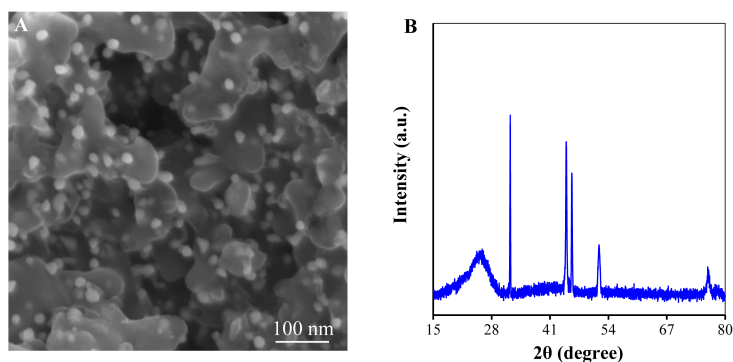

**Fig. s17** SEM and XRD pattern of Pt/Co/Co<sub>3</sub>O<sub>4</sub>/EW-GQD after 5 cycles of use

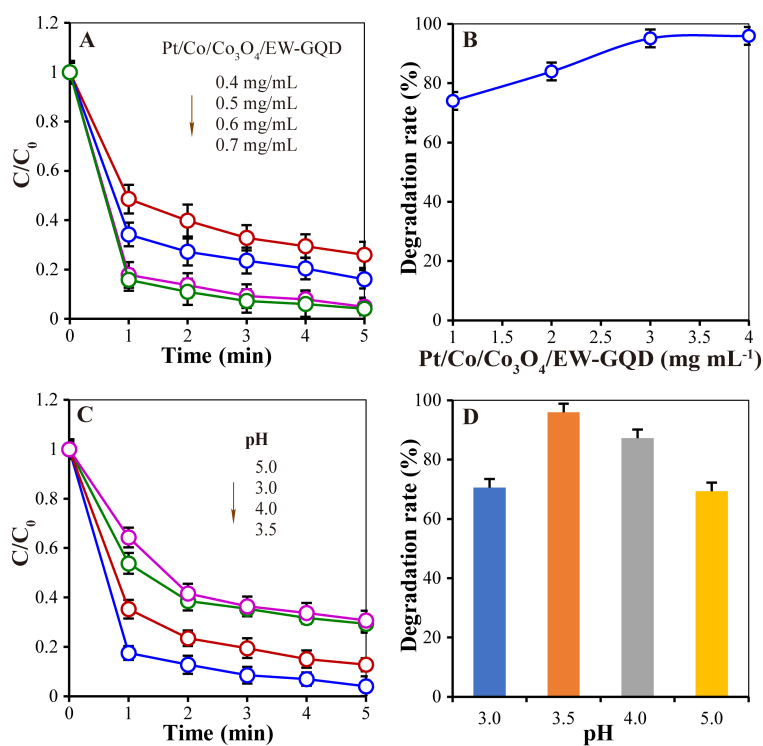

**Fig. s18** Plots (A) of  $C/C_0$  vs. the incubation time and degradation efficiencies (B) of 5 min incubation with  $0.4$ ,  $0.5$ ,  $0.6$  and  $0.7 \text{ mg mL}^{-1}$  Pt/Co/Co<sub>3</sub>O<sub>4</sub>/EW-GQD, plots (C) of  $C/C_0$  vs. the incubation time and degradation efficiencies (D) of 5 min incubation in the pH of  $3.0$ ,  $3.5$ ,  $4.0$  and  $5.0$ .

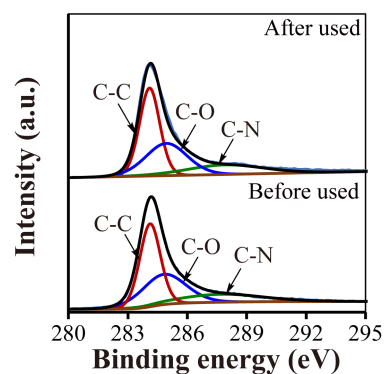

**Fig. s19** High-resolution XPS spectra of C1s of Pt/Co/Co<sub>3</sub>O<sub>4</sub>/EW-GQD nanozyme before and after used

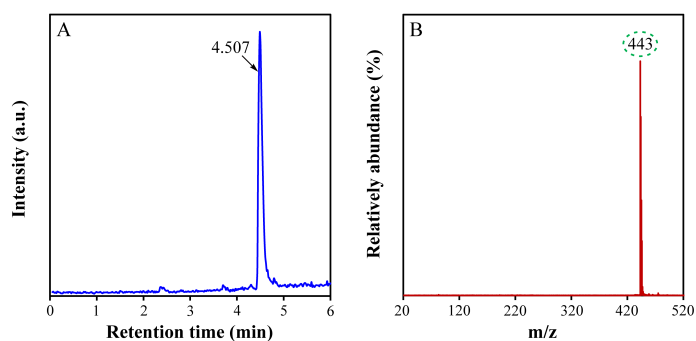

**Fig. s20** High performance liquid chromatography (A) and mass spectra (B) of RhB before degradation

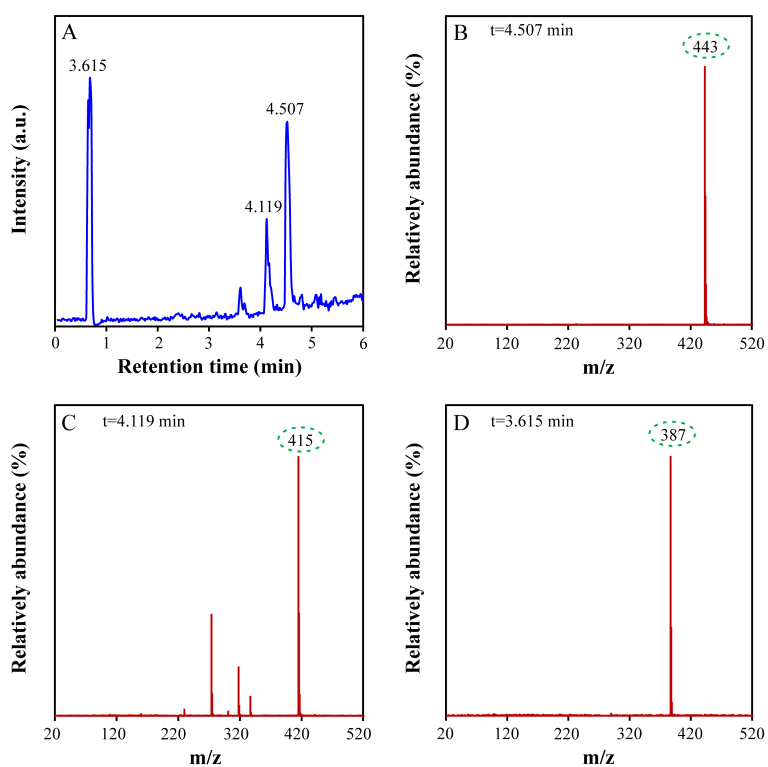

**Fig. s21** High performance liquid chromatography (A) and mass spectra (B-D) of RhB degradation products after

degradation time of 0.5 min

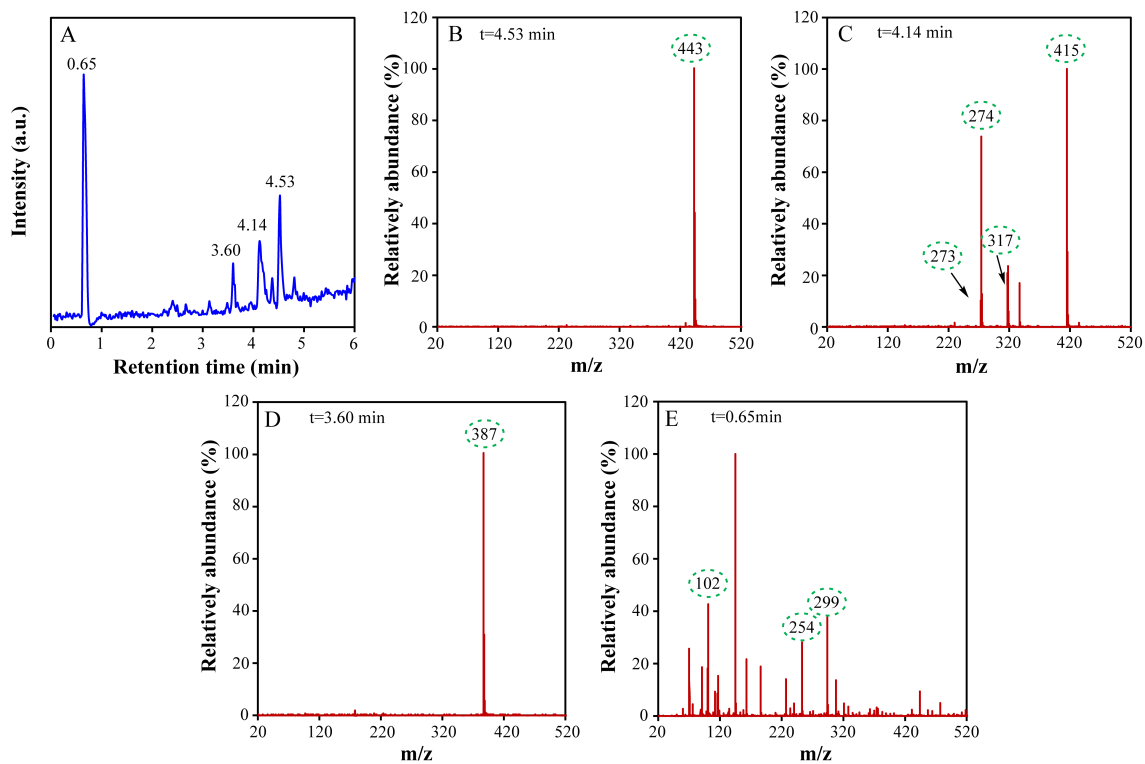

**Fig. s22** High performance liquid chromatography (A) and mass spectra (B-E) of RhB degradation products after degradation time of 1 min

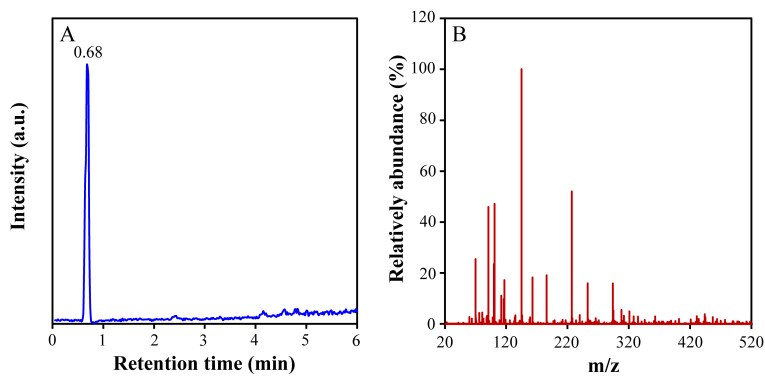

**Fig. s23** High performance liquid chromatography (A) and mass spectra (B) of RhB degradation products after degradation time of 5 min

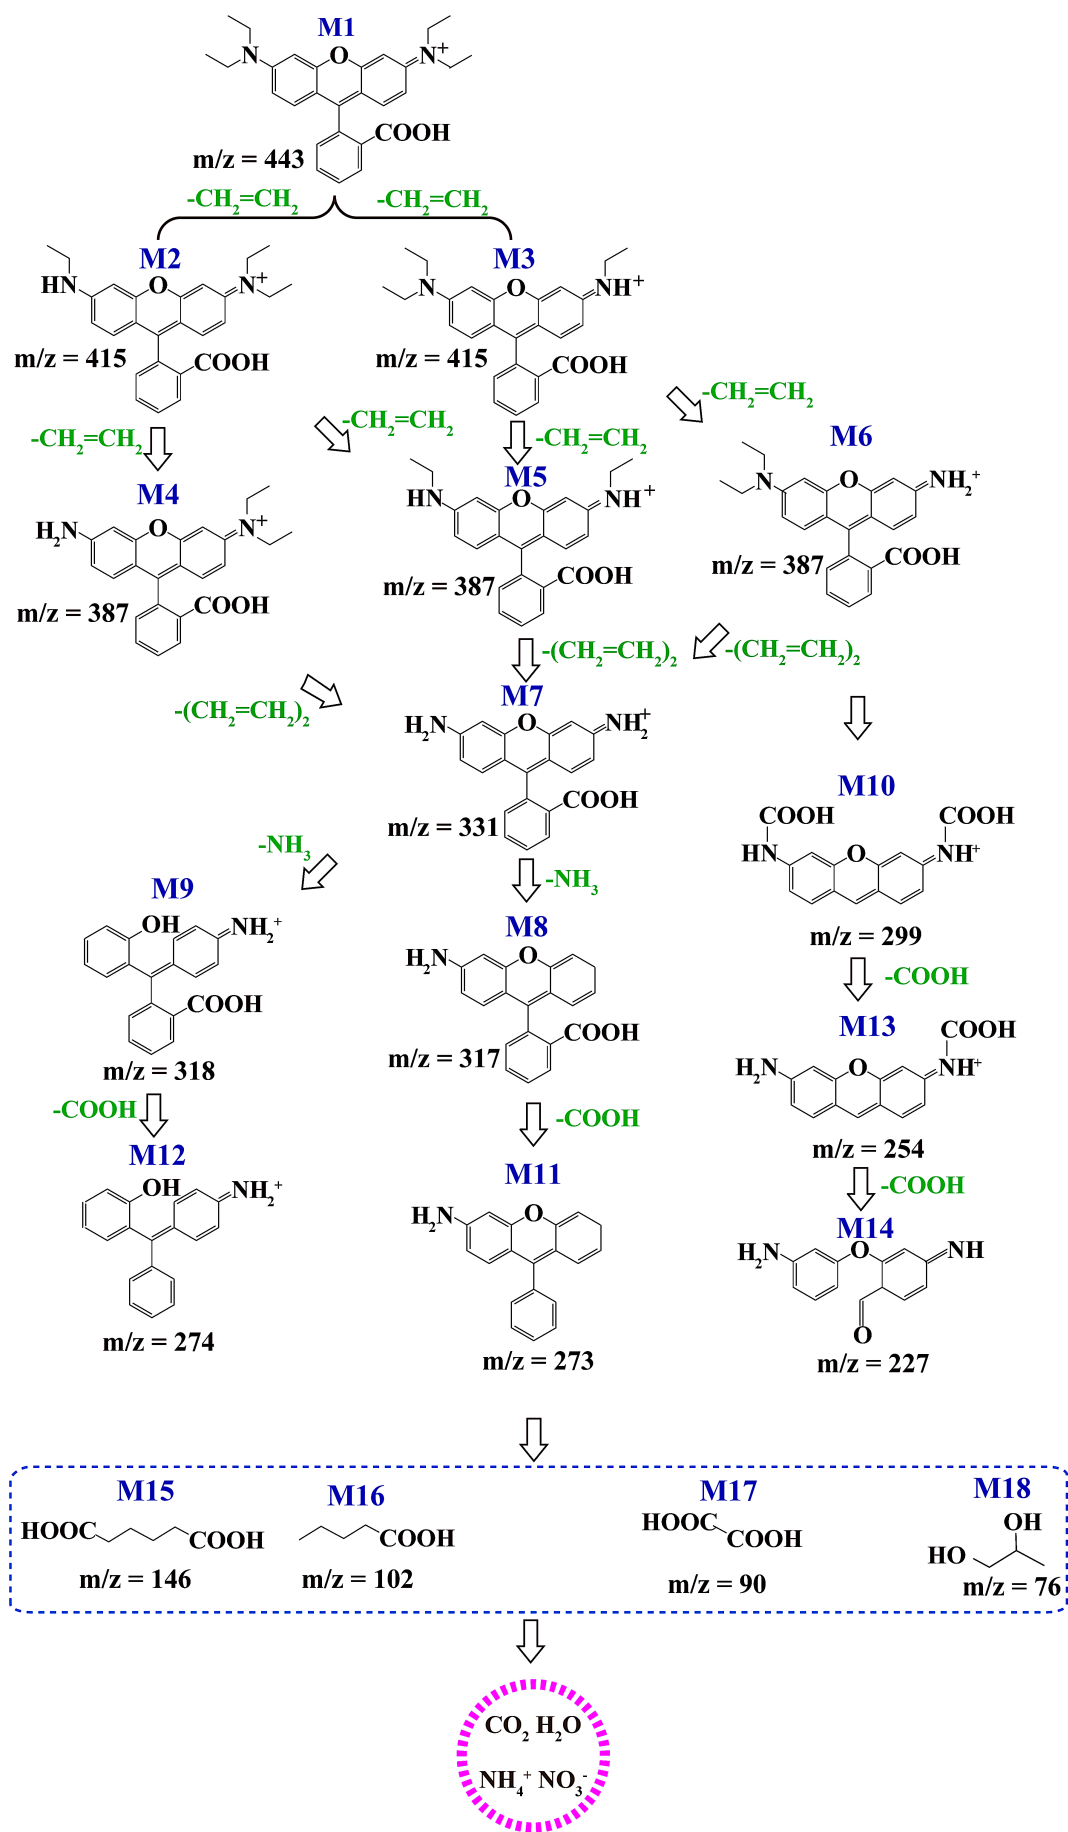

Fig. 24 Possible degradation pathway of Rhodamine B

**Table s1** Impedance parameters of different materials modified ITO glass calculated according to equivalent circuit

| Electrode materials                         | $R_s$ ( $\Omega$ ) | $R_{ct}$ ( $\Omega$ ) |
|---------------------------------------------|--------------------|-----------------------|
| $\text{Co}_3\text{O}_4$                     | 119.1              | 952.6                 |
| $\text{Co@Co}_3\text{O}_4/\text{EW-GQD}$    | 30.1               | 396.5                 |
| $\text{Pt/Co@Co}_3\text{O}_4/\text{EW-GQD}$ | 12.5               | 79.3                  |

**Table s2** Comparison of the kinetic parameters ( $K_M$  and  $V_{max}$ ) of various oxidase-like nanozyme

| Nanozymes                                                                   | $K_M$ (mM) | $V_{max}$ ( $10^{-7} \text{ M s}^{-1}$ ) | Ref.                |
|-----------------------------------------------------------------------------|------------|------------------------------------------|---------------------|
| Fe-N-C single-atom nanozymes                                                | 1.81       | 0.00601                                  | 6                   |
| Defect-rich graphene stabilized atomically dispersed $\text{Cu}_3$ clusters | 2.98       | 1.15                                     | 7                   |
| Hollow $\text{C@MoS}_2$ nanotubes- $\text{Hg}^{2+}$                         | 3.35       | 0.344                                    | 8                   |
| $\text{MoS}_2\text{-Hg}^{2+}$                                               | 5.23       | 0.159                                    | 8                   |
| ZIF-67 nanosheets                                                           | 13.69      | 0.035                                    | 9                   |
| MOF-818 (Zr-Cu)                                                             | 49.87      | 8.47                                     | 10                  |
| MOF-818 (Fe-Cu)                                                             | 8.99       | 2.96                                     | 10                  |
| $\text{Mn}_3\text{O}_4$                                                     | 5.1        | 0.092                                    | 11                  |
| $\text{CuO}_2$ nanodot-encapsulated metal-organic framework                 | 5.29       | 0.11                                     | 12                  |
| $\text{Co}_3\text{O}_4$                                                     | 0.85       | 1.62                                     | <b>Present work</b> |
| $\text{Co@Co}_3\text{O}_4$                                                  | 0.94       | 3.60                                     |                     |
| $\text{Co@Co}_3\text{O}_4/\text{EW-GQD}$                                    | 0.54       | 5.54                                     |                     |
| $\text{Pt/Co@Co}_3\text{O}_4/\text{EW-GQD}$                                 | 0.28       | 16.69                                    |                     |

**Table s3** Comparison of the kinetic parameters ( $K_M$  and  $V_{max}$ ) of various peroxidase-like nanozyme

| Nanozymes               | $K_M$ (mM) |       | $V_{max}$ ( $10^{-7} \text{ M s}^{-1}$ ) |                        | Ref. |
|-------------------------|------------|-------|------------------------------------------|------------------------|------|
|                         | TMB        |       | TMB                                      | $\text{H}_2\text{O}_2$ |      |
| Fe single-atom nanozyme | 3.92       | 0.243 | 5.88                                     | 8.25                   | 13   |
| ZIF-67 nanosheets       | 13.69      | 3.52  | 0.035                                    | 0.028                  | 14   |
| Cu-MOF                  | 4.11       | 6.41  | 5.56                                     | 1.02                   | 15   |
| HRP                     | 0.43       | 3.70  | 1                                        | 0.871                  | 16   |
| Mesoporous iron oxide   | 0.298      | 146.7 | 0.736                                    | 0.637                  | 17   |

|                                              |       |       |       |       |                     |
|----------------------------------------------|-------|-------|-------|-------|---------------------|
| Pt clusters on the Fe single-atom nanozymes  | 1.8   | 19.6  | 14    | 16    | 18                  |
| Fe-Zr-MOL                                    | 1.24  | 0.22  | 0.91  | 0.39  | 19                  |
| Cu-N-C                                       | 3.76  | 19.94 | 7.505 | 2.007 | 20                  |
| Copper nanoclusters                          | 1.125 | 5.1   | 0.72  | 1.68  | 21                  |
| Co <sub>3</sub> O <sub>4</sub>               | 2.10  | 0.71  | 2.73  | 1.65  | <b>Present work</b> |
| Co@Co <sub>3</sub> O <sub>4</sub>            | 0.88  | 1.11  | 3.86  | 2.67  |                     |
| Co@Co <sub>3</sub> O <sub>4</sub> /EW-GQD    | 0.77  | 0.78  | 8.31  | 5.16  |                     |
| Pt/Co@Co <sub>3</sub> O <sub>4</sub> /EW-GQD | 0.061 | 2.16  | 14.30 | 13.31 |                     |

**Table s4** Comparison of catalytic activity of different nanozymes

| Nanozyme                                         | Enzyme-like activity | Specific activity<br>(U mg <sup>-1</sup> ) | Temperature<br>(°C) | Ref.             |
|--------------------------------------------------|----------------------|--------------------------------------------|---------------------|------------------|
| Fe-N-C single-atom nanozyme                      | Peroxidase-like      | 57.76                                      | 37                  | [22]             |
| Citrate-Os NPs                                   | Peroxidase-like      | 393                                        | 55                  | [23]             |
| Citrate-Pt NPs                                   | Peroxidase-like      | 323.7                                      | 55                  | [23]             |
| Citrate-Au NPs                                   | Peroxidase-like      | 1.35                                       | 55                  | [23]             |
| Fe <sub>2</sub> O <sub>3</sub> /carbon nanotubes | Peroxidase-like      | 25.4                                       | 37                  | [24]             |
| Cellulose nanofibrils-supported PdNPs            | Peroxidase-like      | 0.415                                      | 30                  | [25]             |
| Fe,N co-doped ultrathin hollow carbon framework  | Oxidase-like         | 0.277                                      | 30                  |                  |
| Fe,N co-doped ultrathin hollow carbon framework  | Peroxidase-like      | 36.6                                       | 40                  | [26]             |
| N doped carbon                                   | Peroxidase-like      | 6.3                                        | 40                  | [26]             |
| Fe,N co-doped carbon                             | Peroxidase-like      | 15.2                                       | 40                  | [26]             |
| PdNPs/ TEMPO-oxidized cellulose nanofibril       | Peroxidase-like      | 0.215                                      | 30                  | [27]             |
| cellulose nanofibril                             | Oxidase-like         | 0.107                                      | 30                  |                  |
| Prussian blue nanoparticles                      | Peroxidase-like      | 465.8                                      | 37                  | [28]             |
| Fe single-atom/Pt clusters                       | Peroxidase-like      | 87.7                                       | 37                  | [29]             |
| AuPtCo                                           | Peroxidase-like      | 27.1                                       | Room temperature    | [30]             |
| Pyrite                                           | Peroxidase-like      | 58                                         | 37                  | [31]             |
| Pt/Co@Co <sub>3</sub> O <sub>4</sub> /EW-GQD     | Peroxidase-like      | 1662.64                                    | 37                  | <b>This work</b> |
|                                                  | Oxidase-like         | 293.45                                     | 37                  | <b>work</b>      |

**Table s5** The proportion of key elements in different chemical states in fresh and used Pt/Co@Co<sub>3</sub>O<sub>4</sub>/EW-GQD

| Elements | Chemical states | Content before used (%) | Content after used (%) | Change value after and before used (%) |
|----------|-----------------|-------------------------|------------------------|----------------------------------------|
|          |                 |                         |                        |                                        |

|           |                  |       |       |       |
|-----------|------------------|-------|-------|-------|
| <b>C</b>  | C-C              | 38.91 | 46.31 | 7.40  |
|           | C-O              | 39.11 | 34.87 | -4.24 |
|           | C-N              | 21.98 | 18.82 | -3.16 |
| <b>N</b>  | pyrrole N        | 45.38 | 47.08 | 1.70  |
|           | pyridine N       | 35.59 | 32.27 | -3.32 |
|           | graphite N       | 19.03 | 20.65 | 1.62  |
| <b>O</b>  | lattice oxygen   | 74.23 | 75.34 | 1.11  |
|           | oxygen vacancy   | 25.77 | 24.66 | -1.11 |
| <b>Co</b> | Co <sup>0</sup>  | 50.53 | 54.98 | 4.45  |
|           | Co <sup>2+</sup> | 14.47 | 10.26 | -4.21 |
|           | Co <sup>3+</sup> | 35.00 | 34.76 | -0.24 |
| <b>Pt</b> | Pt <sup>2+</sup> | 74.70 | 75.59 | 0.89  |
|           | Pt <sup>4+</sup> | 25.30 | 24.41 | -0.89 |

## Reference

1. Z. G. Khan, T. N. Agrawal, S. B. Bari, S. N. Nangare and P. O. Patil, Application of surface nitrogen-doped graphene quantum dots in the sensing of ferric ions and glutathione: Spectroscopic investigations and DFT calculations, *Spectrochim. Acta A*, 2024, 306, 123608.  
<https://doi.org/10.1016/j.saa.2023.123608>.
2. B. Jiang, D. M. Duan, L. Z. Gao, M. J. Zhou, K. L. Fan, Y. Tang, J. Q. Xi, Y. H. Bi, Z. Tong, G. F. Gao, N. Xie, A. F. Tang, G. H. Nie, M. M. Liang and X. Y. Yan, Standardized assays for determining the catalytic activity and kinetics of peroxidase-like nanozymes, *Nat. Protoc.*, 2018, 3, 1506-1520.  
<https://doi.org/10.1038/s41596-018-0001-1>.
3. G. Kresse and J. Furthmüller, Efficiency of ab-initio total energy calculations for metals and semiconductors using a plane-wave basis set, *Comp. Mater. Sci.*, 1996, 6, 15-50.  
[https://doi.org/10.1016/0927-0256\(96\)00008-0](https://doi.org/10.1016/0927-0256(96)00008-0).
4. G. Kresse and J. Furthmüller, Efficient iterative schemes for ab initio total-energy calculations using a plane-wave basis set, *Phys. Rev. B*, 1996, 54, 11169-11186.  
<https://doi.org/10.1103/PhysRevB.54.11169>.
5. J. P. Perdew, K. Burke and M. Ernzerhof, Generalized Gradient Approximation Made Simple, *Phys. Rev. Lett.*, 1996, 77, 3865-3868.  
<https://doi.org/10.1103/PhysRevLett.77.3865>.

6. Y. Wu, L. Jiao, X. Luo, W. Q. Xu, X. Q. Wei, H. J. Wang, H. Y. Yan, W. L. Gu, B. Z. Xu, D. Du, Y. H. Lin and C. Z. Zhu, Oxidase-Like Fe-N-C Single-Atom Nanozymes for the Detection of Acetylcholinesterase Activity, *Small*, 2019, 15, 1903108.  
<https://doi.org/10.1002/sml.201903108>.
7. F. C. Meng, M. Peng, Y. L. Chen, X. B. Cai, F. Huang, L. N. Yang, X. Liu, T. Li, X. D. Wen, N. Wang, D. Q. Xiao, H. Jiang, L. X. Xia, H. Y. Liu and D. Ma, Defect-rich graphene stabilized atomically dispersed Cu-3 clusters with enhanced oxidase-like activity for antibacterial applications, *Appl. Catal. B: Environ.*, 2022, 301, 120836.  
<https://doi.org/10.1016/j.apcatb.2021.120826>.
8. L. P. Feng, L. X. Zhang, Y. S. Gong, Z. L. Du, X. Chen, X. Y. Qi, X. Q. Zhang, G. J. Mao, H. Wang, Hollow C@MoS<sub>2</sub> nanotubes with Hg<sup>2+</sup>-triggered oxidase-like catalysis: A colorimetric method for detection of Hg<sup>2+</sup> ions in wastewater, *Sensor. Actuat. B: Chem.*, 2022, 361 () 131725.  
<https://doi.org/10.1016/j.snb.2022.131725>.
9. S. J. Wang, D. P. Xu, L. Ma, J. X. Qiu, X. Wang, Q. L. Dong, Q. Zhang, J. Pan and Q. Liu, Ultrathin ZIF-67 nanosheets as a colorimetric biosensing platform for peroxidase-like catalysis, *Anal. Bioanal. Chem.*, 2018, 410, 7145-7152.  
<https://doi.org/10.1007/s00216-018-1317-y>.
10. S. Kulandaivel, C. H. Lin and Y. C. Yeh, The bi-metallic MOF-919 (Fe-Cu) nanozyme capable of bifunctional enzyme-mimicking catalytic activity, *Chem. Commun.*, 2022, 58, 569-572.  
<https://doi.org/10.1039/d1cc05908d>.
11. Y. R. Chen, Y. D. Xia, Y. W. Liu, Y. Tang, F. Q. Zhao and B. Z. Zeng, Colorimetric and electrochemical detection platforms for tetracycline based on surface molecularly imprinted polyionic liquid on Mn<sub>3</sub>O<sub>4</sub> nanozyme, *Biosens. Bioelectron.*, 2022, 216, 114650.  
<https://doi.org/10.1016/j.bios.2022.114650>.
12. W. H. Wang, S. Xiao, M. L. Zeng, H. Z. Xie and N. Gan, Dual-mode colorimetric-electrochemical biosensor for *Vibrio parahaemolyticus* detection based on CuO<sub>2</sub> nanodot-encapsulated metal-organic framework nanozymes, *Sensor. Actuat. B: Chem.*, 2023, 387, 133835.  
<https://doi.org/10.1016/j.snb.2023.133835>.
13. C. Zhao, C. Xiong, X. K. Liu, M. Qiao, Z. J. Li, T. W. Yuan, J. Wang, Y. T. Qu, X. Q. Wang, F. Y. Zhou, Q. Xu, S. Q. Wang, M. Chen, W. Y. Wang, Y. F. Li, T. Yao, Y. E. Wu and Y. D. Li, Unraveling the enzyme-like activity of heterogeneous single atom catalyst, *Chem. Comm.*, 2019, 55, 2285-2288.  
<https://doi.org/10.1039/c9cc00199a>.



14. S. J. Wang, D. P. Xu, L. Ma, J. X. Qiu, X. Wang, Q. L. Dong, Q. Zhang, J. Pan and Q. Liu, Ultrathin ZIF-67 nanosheets as a colorimetric biosensing platform for peroxidase-like catalysis, *Anal. Bioanal. Chem.*, 2018, 410, 7145–7152.  
<https://doi.org/10.1007/s00216-018-1317-y>.
15. C. H. Wang, J. Gao and H. L. Tan, Integrated Antibody with Catalytic Metal-Organic Framework for Colorimetric Immunoassay, *ACS Appl. Mater. Interfaces*, 2018, 10, 25113-25120.  
<https://doi.org/10.1021/acsami.8b07225>.
16. M. M. Liang and X. Y. Yan, Nanozymes: From New Concepts, Mechanisms, and Standards to Applications, *Acc. Chem. Res.*, 2019, 52, 2190-2200.  
<https://doi.org/10.1021/acs.accounts.9b00140>.
17. R. Bhattacharjee, S. Tanaka, S. Moriam, M. Kamal Masud, J. J. Lin, S. M. Alshehri, T. Ahamad, R. R. Salunkhe, N. T. Nguyen, Y. Yamauchi, M. S. A. Hossain and M. J. A. Shiddiky, Porous nanozymes: the peroxidase-mimetic activity of mesoporous iron oxide for the colorimetric and electrochemical detection of global DNA methylation, *J. Mater. Chem. B*, 2018, 6, 4783-4791.  
<https://doi.org/10.1039/c8tb01132j>.
18. Y. F. Chen, L. Jiao, H. Y. Yan, W. Q. Xu, Y. Wu, L. R. Zheng, W. L. Gu and C. Z. Zhu, Fe-N-C Single-Atom Catalyst Coupling with Pt Clusters Boosts Peroxidase-like Activity for Cascade-Amplified Colorimetric Immunoassay, *Anal. Chem.*, 2021, 93, 12353-12359.  
<https://doi.org/10.1021/acs.analchem.1c02115>.
19. Z. Wu, J. Wen, J. Li, L. Chen, W. Li and K. Yang, The engineering design of single-site nanozyme based on metal-organic layers for the detection of antioxidant substances, *Mater. Today Chem.*, 2023, 30, 101598.  
<https://doi.org/10.1016/j.mtchem.2023.101598>.
20. Y. Wu, J. B. Wu, L. Jiao, W. Q. Xu, H. J. Wang, X. Q. Wei, W. L. Gu, G. X. Ren, N. Zhang, Q. H. Zhang, L. Huang, L. Gu and C. Z. Zhu, Cascade Reaction System Integrating Single-Atom Nanozymes with Abundant Cu Sites for Enhanced Biosensing, *Anal. Chem.*, 2020, 92, 3373-3379.  
<https://dx.doi.org/10.1021/acs.analchem.9b05437>.
21. C. Y. Liu, Y. Y. Cai, J. Wang, X. Liu, H. Ren, L. Yan, Y. J. Zhang, S. Q. Yang, J. Guo and A. H. Liu, Facile Preparation of Homogeneous Copper Nanoclusters Exhibiting Excellent Tetraenzyme Mimetic Activities for Colorimetric Glutathione Sensing and Fluorimetric Ascorbic Acid Sensing, *ACS Appl. Mater. Interfaces*, 2020, 12, 42521-42530.  
<https://dx.doi.org/10.1021/acsami.0c11983>.

22. X. H. Niu, Q. R. Shi, W. L. Zhu, D. Liu, H. Y. Tian, S. F. Fu, N. Cheng, S. Q. Li, J. N. Smith, D. Du and Y. H. Lin, Unprecedented peroxidase-mimicking activity of single-atom nanozyme with atomically dispersed Fe–N<sub>x</sub> moieties hosted by MOF derived porous carbon, *Biosens. Bioelectron.*, 2019, 142, 111495.  
<https://doi.org/10.1016/j.bios.2019.111495>.
23. S. B. He, L. Yang, P. Balasubramanian, S. J. Li, H. P. Peng, Y. Kuang, H. H. Deng and W. Chen, Osmium nanozyme as peroxidase mimic with high performance and negligible interference of O<sub>2</sub>, *J. Mater. Chem. A*, 2020, 8, 25226-25234.  
<https://doi.org/10.1039/d0ta09247a>.
24. Y. C. Yang, T. Li, Y. Qin, L. B. Zhang and Y. Chen, Construct of Carbon Nanotube-Supported Fe<sub>2</sub>O<sub>3</sub> Hybrid Nanozyme by Atomic Layer Deposition for Highly Efficient Dopamine Sensing, *Front. Chem.*, 2020, 8, 564968.  
<https://doi.org/10.3389/fchem.2020.564968>
25. R. Dadigala, R. Bandi, M. Alle, C. W. Park, S. Y. Han, G. J. Kwon and S. H. Lee, Effective fabrication of cellulose nanofibrils supported Pd nanoparticles as a novel nanozyme with peroxidase and oxidase-like activities for efficient dye degradation, *J. Hazard. Mater.*, 2022, **436**, 129165.  
<https://doi.org/10.1016/j.jhazmat.2022.129165>.
26. J. Y. Hao, C. Zhang, C. X. Feng, Q. Wang, Z. Y. Liu, Y. Li, J. S. Mu, E. C. Yang and Y. Wang, An ultra-highly active nanozyme of Fe,N co-doped ultrathin hollow carbon framework for antibacterial application, *Chinese Chem. Lett.*, 2023, 34, 107650.  
<https://doi.org/10.1016/j.ccllet.2022.06.073>.
27. R. Dadigala, R. Bandi, S. Y. Han, G. J. Kwon and S. H. Lee, Rapid in-situ growth of enzyme-mimicking Pd nanoparticles on TEMPO-oxidized nanocellulose for the efficient detection of ascorbic acid, *Int. J. Biol. Macromol.*, 2023, 234, 123657.  
<https://doi.org/10.1016/j.ijbiomac.2023.123657>.
28. Z. G. Qin, B. Chen, Y. Mao, C. Shi, Y. Li, X. Huang, F. Yang and N. Gu, Achieving Ultrasmall Prussian Blue Nanoparticles as HighPerformance Biomedical Agents with Multifunctions, *ACS Appl. Mater. Interfaces*, 2020, 12, 57382-57390.  
<https://dx.doi.org/10.1021/acscami.0c18357>.
29. Y. F. Chen, L. Jiao, H. Y. Yan, W. Q. Xu, Y. Wu, L. R. Zheng, W. L. Gu and C. Z. Zhu, Fe–N–C Single-Atom Catalyst Coupling with Pt Clusters Boosts Peroxidase-like Activity for Cascade-Amplified Colorimetric Immunoassay, *Anal. Chem.*, 2021, 93, 12353-12359.  
<https://doi.org/10.1021/acs.analchem.1c02115>.

30. X. Y. Zhou, C. Fan, Q. W. Tian, C. H. Han, Z. Q. Yin, Z. Y. Dong and S. Bi, Trimetallic AuPtCo Nanopolyhedrons with Peroxidase- and Catalase-Like Catalytic Activity for Glow-Type Chemiluminescence Bioanalysis, *Anal. Chem.*, 2022, 94, 847-855.

<https://doi.org/10.1021/acs.analchem.1c03572>.

31. X. Q. Meng, D. D. Li, L. Chen, H. L. He, Q. Wang, C. Y. Hong, J. Y. He, X. F. Gao, Y. L. Yang, B. Jiang, G. H. Nie, X. Y. Yan, L. Z. Gao and K. L. Fan, High-Performance Self-Cascade Pyrite Nanozymes for Apoptosis–Ferroptosis Synergistic Tumor Therapy, *ACS Nano*, 2021, 15, 5735-5751.

<https://dx.doi.org/10.1021/acsnano.1c01248>.
